# Supplementary material for: A cluster-of-functional-groups approach for studying organic enhanced atmospheric cluster formation
Source: Copernicus journal article supplement (doi:10.5194/ar-2-123-2024), 2024-06-04
Supplement: Supplementary file 1 [file ar-2-123-2024-supplement.pdf]

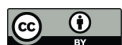

*Supplement of*

## **A cluster-of-functional-groups approach for studying organic enhanced atmospheric cluster formation**

**Astrid Nørskov Pedersen et al.**

*Correspondence to:* Jonas Elm ([jelm@chem.au.dk](mailto:jelm@chem.au.dk))

The copyright of individual parts of the supplement might differ from the article licence.

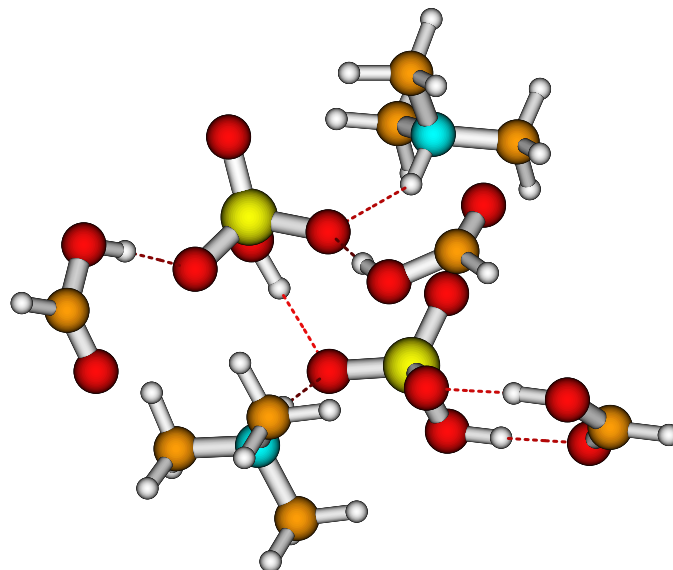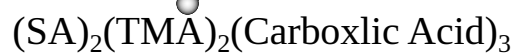

**Figure S1.** The  $(SA)_2(TMA)_2(\text{Carboxylic Acid})_3$  cluster geometry lowest in free energy. Calculated at the DLPNO-CCSD( $T_0$ )/aug-cc-pVTZ// $\omega$ B97X-D/6-31++G(d,p) level of theory with quasi-harmonic cutoff of  $100\text{ cm}^{-1}$ , at 298.15 K and 1 atm. White = hydrogen, brown = carbon, red = oxygen, yellow = sulfur, blue = nitrogen.

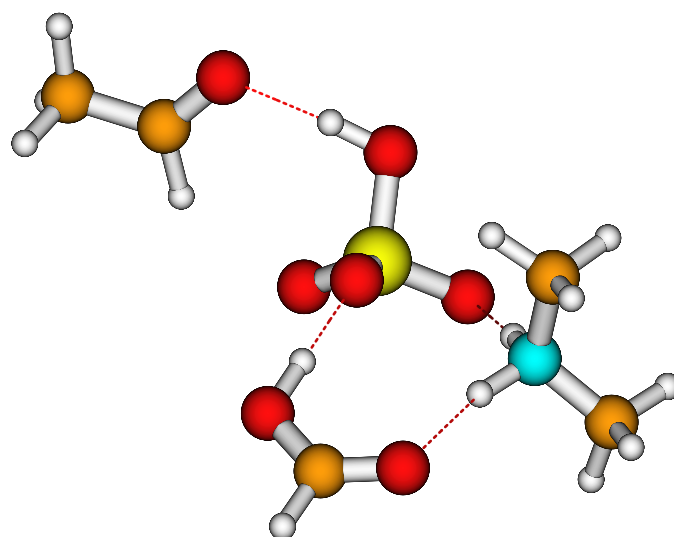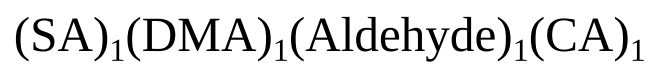

**Figure S2.** The  $(SA)_1(DMA)_1(Aldehyde)_1(Carboxylic\ Acid)_1$  cluster geometry second lowest in free energy (+0.62 kcal/mol). Calculated at the DLPNO-CCSD( $T_0$ )/aug-cc-pVTZ// $\omega$ B97X-D/6-31++G(d,p) level of theory with quasi-harmonic cutoff of  $100\text{ cm}^{-1}$ , at 298.15 K and 1 atm. White = hydrogen, brown = carbon, red = oxygen, yellow = sulfur, blue = nitrogen.

## S2 Fluxes

**Table S1.** Sum of outgrowing channels that contribute over 2 % to the total flux and contain OOM. The SA concentration was fixed at  $10^6 \text{ cm}^{-3}$ .

| System     | C <sub>OOM</sub> (ppt) | C <sub>base</sub> (ppt) | Outgrowing (%) |
|------------|------------------------|-------------------------|----------------|
| SA-AM-OOM  | 1                      | 10                      | 97.96          |
|            | 1                      | 10000                   | 97.95          |
|            | 10                     | 10                      | 99.80          |
|            | 10                     | 10000                   | 99.81          |
| SA-MA-OOM  | 1                      | 1                       | 98.86          |
|            | 1                      | 100                     | 99.05          |
|            | 10                     | 1                       | 99.72          |
|            | 10                     | 100                     | 99.74          |
| SA-DMA-OOM | 1                      | 1                       | 72.44          |
|            | 1                      | 10                      | 83.77          |
|            | 10                     | 1                       | 99.03          |
|            | 10                     | 10                      | 99.67          |
| SA-TMA-OOM | 1                      | 1                       | 7.52           |
|            | 1                      | 10                      | 12.39          |
|            | 10                     | 1                       | 78.97          |
|            | 10                     | 10                      | 87.22          |
